# Supplementary material
Source: PubMed Central journal article supplement (PMC4408741)
Supplement: jn.115.210005_nutrition210005SupplementaryData1.pdf [file jn.115.210005_nutrition210005SupplementaryData1.pdf]

Online Supporting Material

Supplemental TABLE 1. The effects of the *FTO* rs1558902 and rs9939609 genotypes on the response of glucose, insulin and insulin resistance to dietary fat intervention in whites only<sup>1</sup>

| Outcomes                               | rs1558902 |      |      |          |      |      |                       | rs9939609 |      |      |          |      |      |                       |
|----------------------------------------|-----------|------|------|----------|------|------|-----------------------|-----------|------|------|----------|------|------|-----------------------|
|                                        | Low fat   |      |      | High fat |      |      | <i>P</i> -interaction | Low fat   |      |      | High fat |      |      | <i>P</i> -interaction |
|                                        | Beta      | SE   | P    | Beta     | SE   | P    |                       | Beta      | SE   | P    | Beta     | SE   | P    |                       |
| Model 1                                |           |      |      |          |      |      |                       |           |      |      |          |      |      |                       |
| ΔFasting glucose, <sup>2</sup> mg/dl   | 0.35      | 0.46 | 0.45 | -0.05    | 0.51 | 0.92 | 0.51                  | 0.19      | 0.48 | 0.69 | 0.15     | 0.53 | 0.78 | 0.98                  |
| ΔFasting insulin, <sup>2,3</sup> μU/ml | 0.04      | 0.03 | 0.11 | -0.03    | 0.03 | 0.28 | 0.07                  | 0.05      | 0.03 | 0.04 | -0.03    | 0.03 | 0.36 | 0.04                  |
| ΔHOMA-IR <sup>2,3</sup>                | 0.05      | 0.03 | 0.09 | -0.03    | 0.03 | 0.30 | 0.07                  | 0.05      | 0.03 | 0.04 | -0.02    | 0.03 | 0.44 | 0.06                  |
| ΔHOMA-beta <sup>2,3</sup>              | 0.03      | 0.03 | 0.30 | -0.02    | 0.03 | 0.38 | 0.20                  | 0.05      | 0.03 | 0.11 | -0.02    | 0.03 | 0.36 | 0.08                  |
| Model 2                                |           |      |      |          |      |      |                       |           |      |      |          |      |      |                       |
| ΔFasting glucose, <sup>2</sup> mg/dl   | 0.32      | 0.46 | 0.49 | -0.05    | 0.49 | 0.93 | 0.57                  | 0.16      | 0.48 | 0.74 | 0.17     | 0.51 | 0.74 | 0.92                  |
| ΔFasting insulin, <sup>2,3</sup> μU/ml | 0.04      | 0.03 | 0.15 | -0.03    | 0.03 | 0.24 | 0.07                  | 0.05      | 0.03 | 0.06 | -0.02    | 0.03 | 0.34 | 0.06                  |
| ΔHOMA-IR <sup>2,3</sup>                | 0.04      | 0.03 | 0.13 | -0.03    | 0.03 | 0.25 | 0.07                  | 0.05      | 0.03 | 0.07 | -0.02    | 0.03 | 0.42 | 0.08                  |
| ΔHOMA-beta <sup>2,3</sup>              | 0.03      | 0.03 | 0.37 | -0.02    | 0.03 | 0.37 | 0.23                  | 0.04      | 0.03 | 0.15 | -0.02    | 0.03 | 0.36 | 0.10                  |

<sup>1</sup> Values are beta coefficients (Beta), standard errors (SE), and P values (P and *P*-interactions). P values for Model 1 are adjusted for age, sex, race, follow-up time, baseline values for respective outcomes, and concurrent weight change; P values for Model 2 are further adjusted for baseline BMI. Boldface P values indicate statistical significance. *FTO*, fat mass and obesity associated; HOMA-beta, homeostasis model assessment of beta cell function; HOMA-IR, homeostasis model assessment of insulin resistance.

<sup>2</sup> the Δ variables indicate the change of respective outcomes, i.e., the levels at 2 years minus the baseline levels.

<sup>3</sup> the log-transformed levels at 2 years minus the log-transformed baseline levels.
